# Supplementary material for: Electrospun TiO2 nanofiber integrated lab-on-a-disc for ultrasensitive protein detection from whole blood
Source: Royal Society of Chemistry journal article supplement (doi:10.1039/c4lc00900b), 2014-11-04
Supplement: c4lc00900b1.pdf [file c4lc00900b1.pdf]

## Electronic Supplementary Information

# Electrospun TiO<sub>2</sub>-Nanofibers Integrated Lab-on-a-Disc for Ultrasensitive Protein Detection from Whole Blood

Won Seok Lee,<sup>1,‡</sup> Vijaya Sunkara,<sup>1,‡</sup> Ja-Ryoung Han,<sup>1</sup> Yang-Seok Park,<sup>1</sup> Yoon-Kyoung Cho<sup>1,2,\*</sup>

<sup>1</sup>*School of Life Sciences, Ulsan National Institute of Science and Technology (UNIST),  
UNIST-gil 50, Ulsan 689-798, Republic of Korea;*

<sup>2</sup>*Center for Soft and Living Matter, Institute for Basic Science (IBS),  
UNIST-gil 50, Ulsan 689-798, Republic of Korea*

**Fig. S1.** Experimental set up for chemiluminescence detection on a disc. The chemiluminescence signal is measured by a home built detection system equipped with a cooled PMT module (PMC-100-1, Becker & Hickl GmbH)

**Fig. S2.** Microscopic analyses of the electrospun TiO<sub>2</sub> NFs prepared at various flow rates (a, d) 0.3 mL h<sup>-1</sup>, (b, e) 1 mL h<sup>-1</sup>, and (c, f) 3 mL h<sup>-1</sup> at an applied voltage of 15 kV and a fixed distance of 10 cm between the needle and the grounded substrate.

**Fig. S3.** Comparison of the TiO<sub>2</sub> NF mats on PDMS pre-cured for 3 min and 30 min: (a) TiO<sub>2</sub> NF mat submerged into PDMS pre-cured for 3 min and (b) detachment of the TiO<sub>2</sub> NF mat from the PDMS pre-cured for 30 min at 65°C.

**Fig.S4.** Tack test to measure the adhesion force of the pre-cured PDMS layer, cured for different lengths of time.

**Fig. S5.** TEM–EDS analysis of electrospun TiO<sub>2</sub> NFs.

**Fig. S6.** Histogram of the TiO<sub>2</sub> NF diameter for NFs fabricated at a flow rate of 0.3 mL h<sup>-1</sup>, an applied voltage of 15 kV, and a distance of 10 cm between the needle and the grounded substrate.

**Fig. S7.** Standard curves for the optimization of capture and secondary antibody concentrations.

**Fig. S8.** Calibration graphs for the detection of CRP spiked in a CRP-free serum created by plotting the RLU versus the CRP concentration for a 96-well plate [LOD: 286 pg/mL (2288 fM)], LD TiO<sub>2</sub> NFs assembled on a Si substrate [LOD: 8 pg/mL (64 fM)], HD TiO<sub>2</sub> NFs assembled on a Si substrate [LOD: 2.5 pg/mL (20 fM)], and HD TiO<sub>2</sub> NFs assembled on a lab-on-a-disc [LOD: 0.8 pg/mL (~6 fM)]. Error bars indicate the standard deviation of at least three independent measurements.

**Fig. S9.** Calibration graphs for the detection of cTnI spiked in healthy serum and PBS created by plotting the RLU versus the cTnI concentration in serum for HD TiO<sub>2</sub> NFs assembled on a disc [LOD: 37 pg/mL (1.5 pM)], 96-well plate [LOD: 824 pg/mL (33 pM)], HD TiO<sub>2</sub> NFs assembled on a Si substrate [LOD: 64 pg/mL (2.6 pM)], and cTnI in PBS for HD TiO<sub>2</sub> NFs assembled on a Si substrate [LOD: 4.4 pg/mL (0.18 pM)]. Error bars indicate the standard deviation of at least three independent measurements.

**Table S1.** Weight and atomic composition of a single TiO<sub>2</sub> NF by TEM–EDS analysis.

**Table S2.** Surface atomic composition of TiO<sub>2</sub> NFs from XPS

**Table S3.** Spin program for the immunoassay in a centrifugal microfluidic disc.

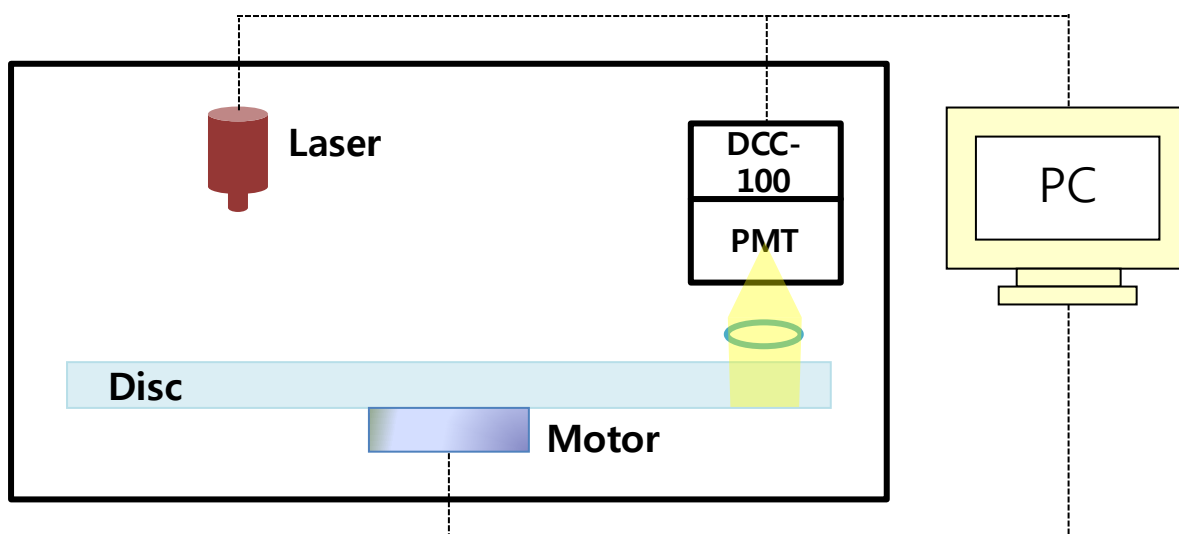

**Fig. S1.** Experimental set up for chemiluminescence detection on a disc. The chemiluminescence signal is measured by a home built detection system equipped with a cooled PMT module (PMC-100-1, Becker & Hickl GmbH)

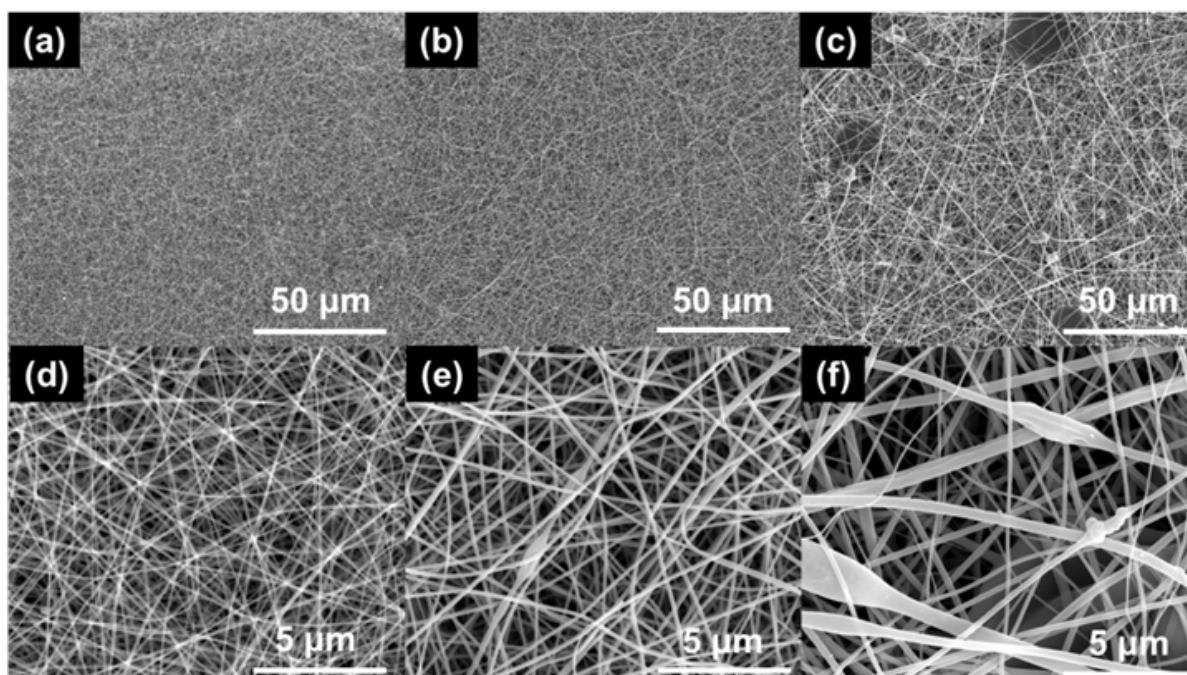

**Fig. S2.** Microscopic analyses of the electrospun TiO<sub>2</sub> NFs prepared at various flow rates (a, d) 0.3 mL h<sup>-1</sup>, (b, e) 1 mL h<sup>-1</sup>, and (c, f) 3 mL h<sup>-1</sup> at an applied voltage of 15 kV and a fixed distance of 10 cm between the needle and the grounded substrate.

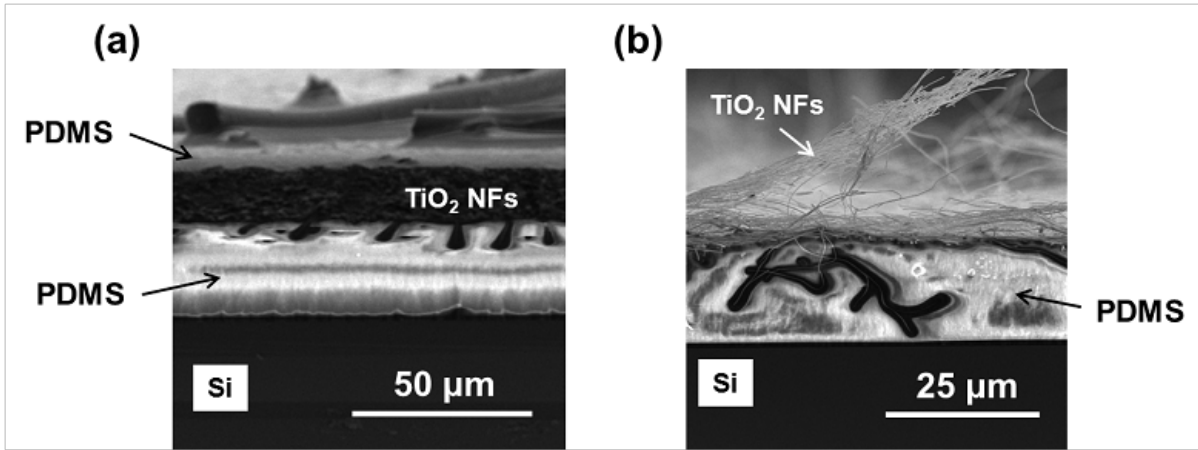

**Fig. S3.** Comparison of the TiO<sub>2</sub> NF mats on PDMS pre-cured for 3 min and 30 min: (a) TiO<sub>2</sub> NF mat submerged into PDMS pre-cured for 3 min and (b) detachment of the TiO<sub>2</sub> NF mat from the PDMS pre-cured for 30 min at 65°C.

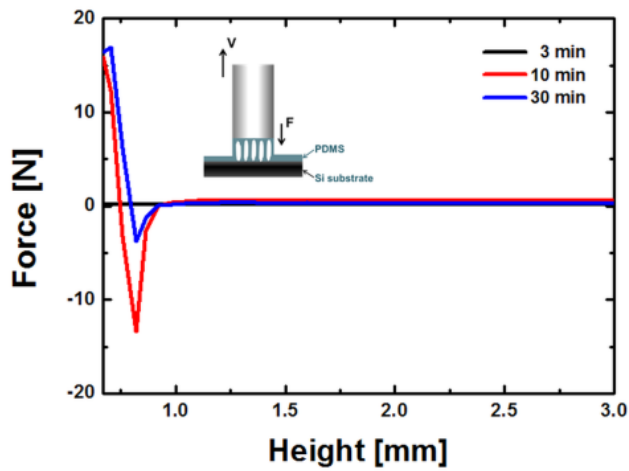

**Fig. S4.** Tack test to measure the adhesion force of the pre-cured PDMS layer, cured for different lengths of time.

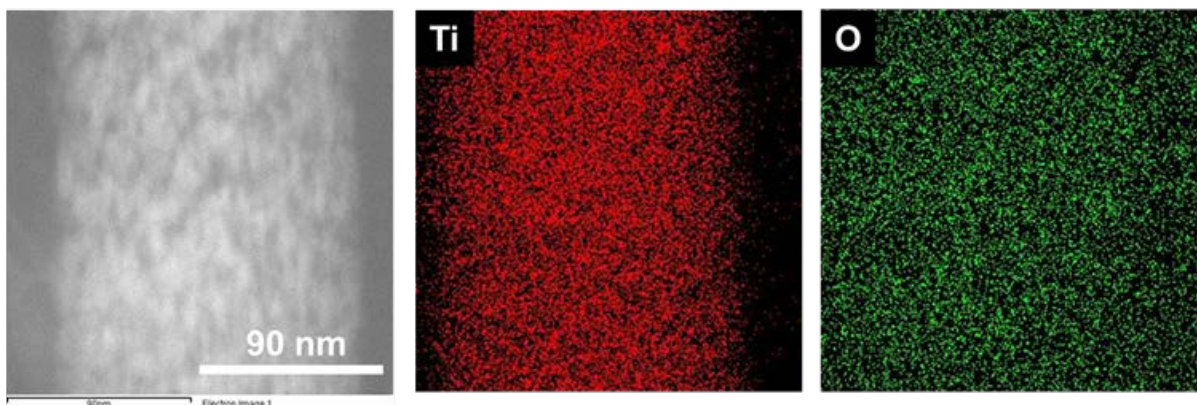

**Fig. S5.** TEM-EDS analysis of electrospun  $\text{TiO}_2$  NFs.

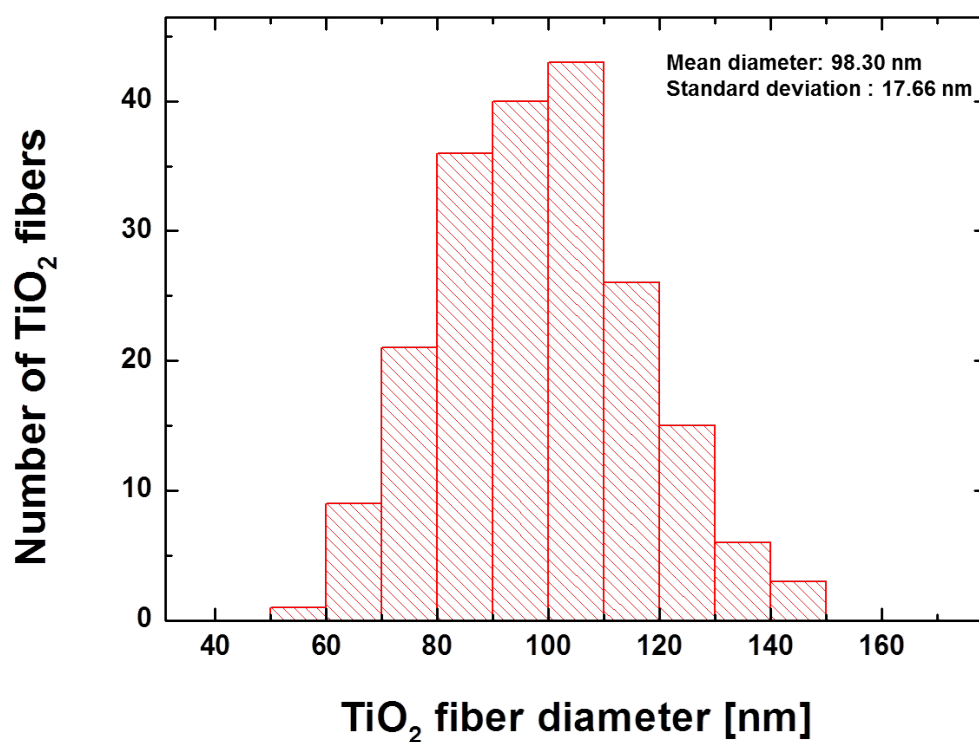

**Fig. S6.** Histogram of the  $\text{TiO}_2$  NF diameter for NFs fabricated at a flow rate of  $0.3 \text{ mL h}^{-1}$ , an applied voltage of 15 kV, and a distance of 10 cm between the needle and the grounded substrate.

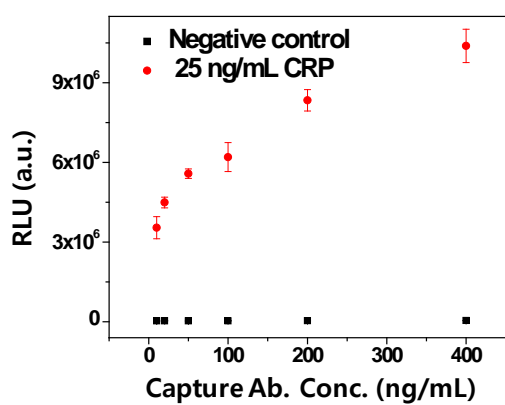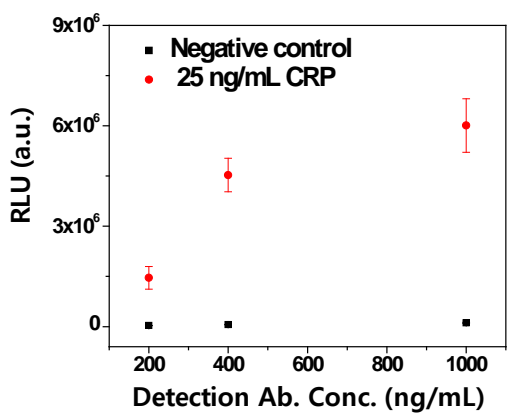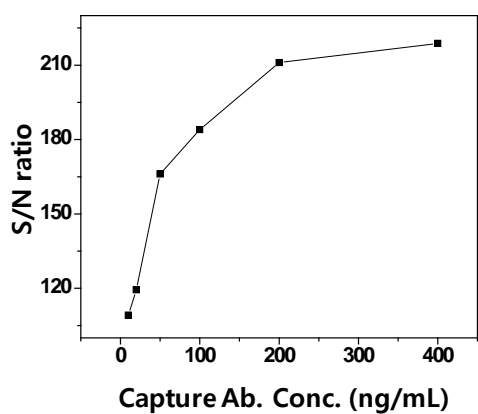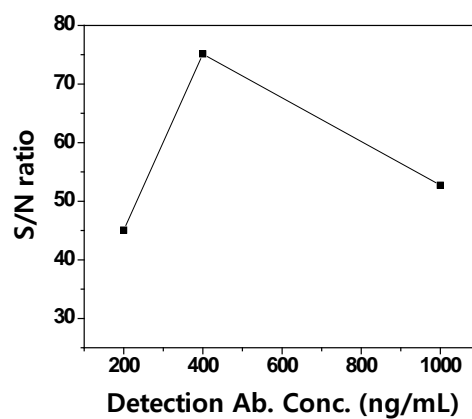

Fig. S7. Standard curves for the optimization of capture and secondary antibody concentrations.

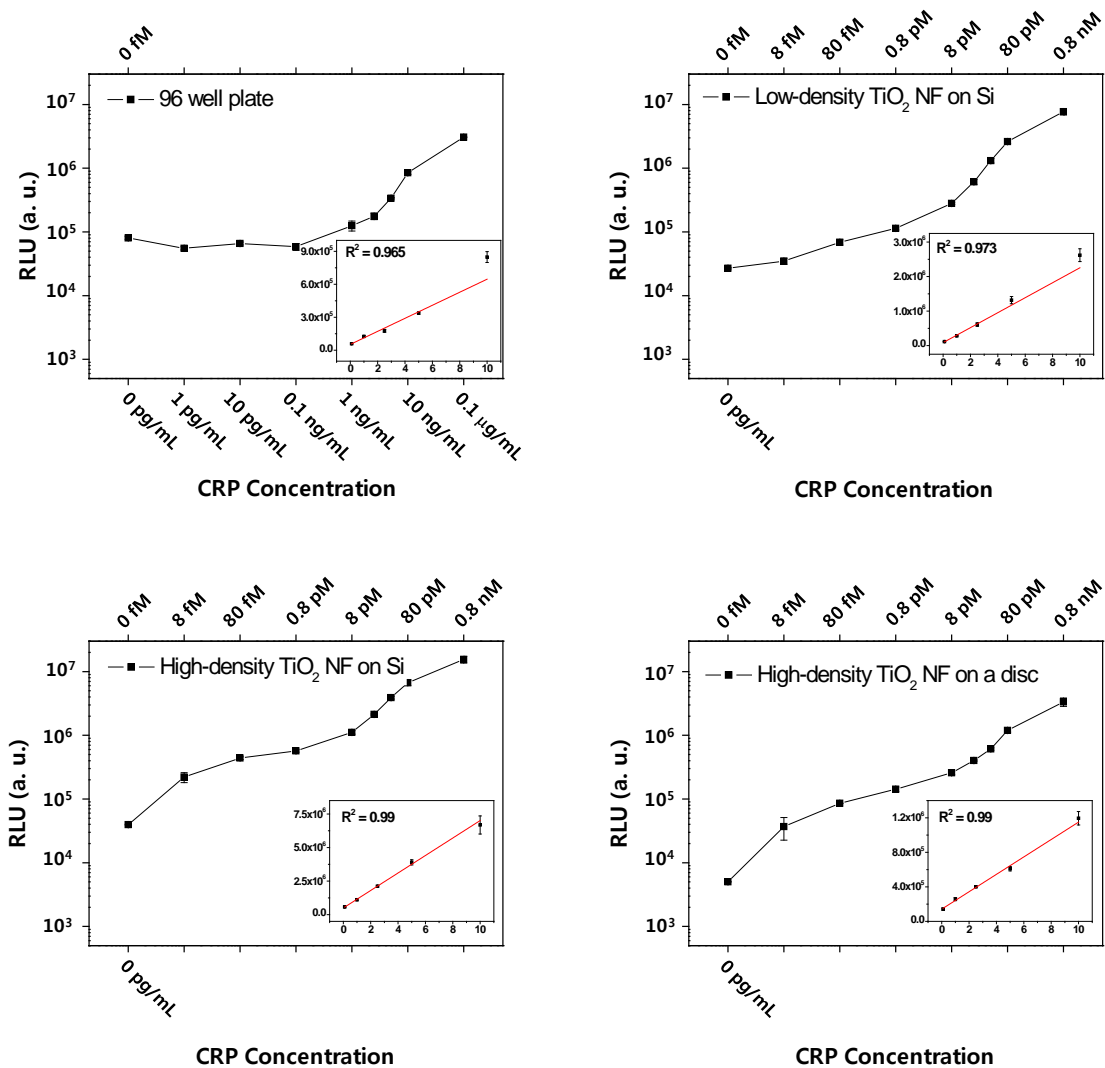

**Fig. S8.** Calibration graphs for the detection of CRP spiked in a CRP-free serum created by plotting the RLU versus the CRP concentration for a 96-well plate [LOD: 286 pg/mL (2288 fM)], LD TiO<sub>2</sub> NFs assembled on a Si substrate [LOD: 8 pg/mL (64 fM)], HD TiO<sub>2</sub> NFs assembled on a Si substrate [LOD: 2.5 pg/mL (20 fM)], and HD TiO<sub>2</sub> NFs assembled on a lab-on-a-disc [LOD: 0.8 pg/mL (~6 fM)]. Error bars indicate the standard deviation of at least three independent measurements.

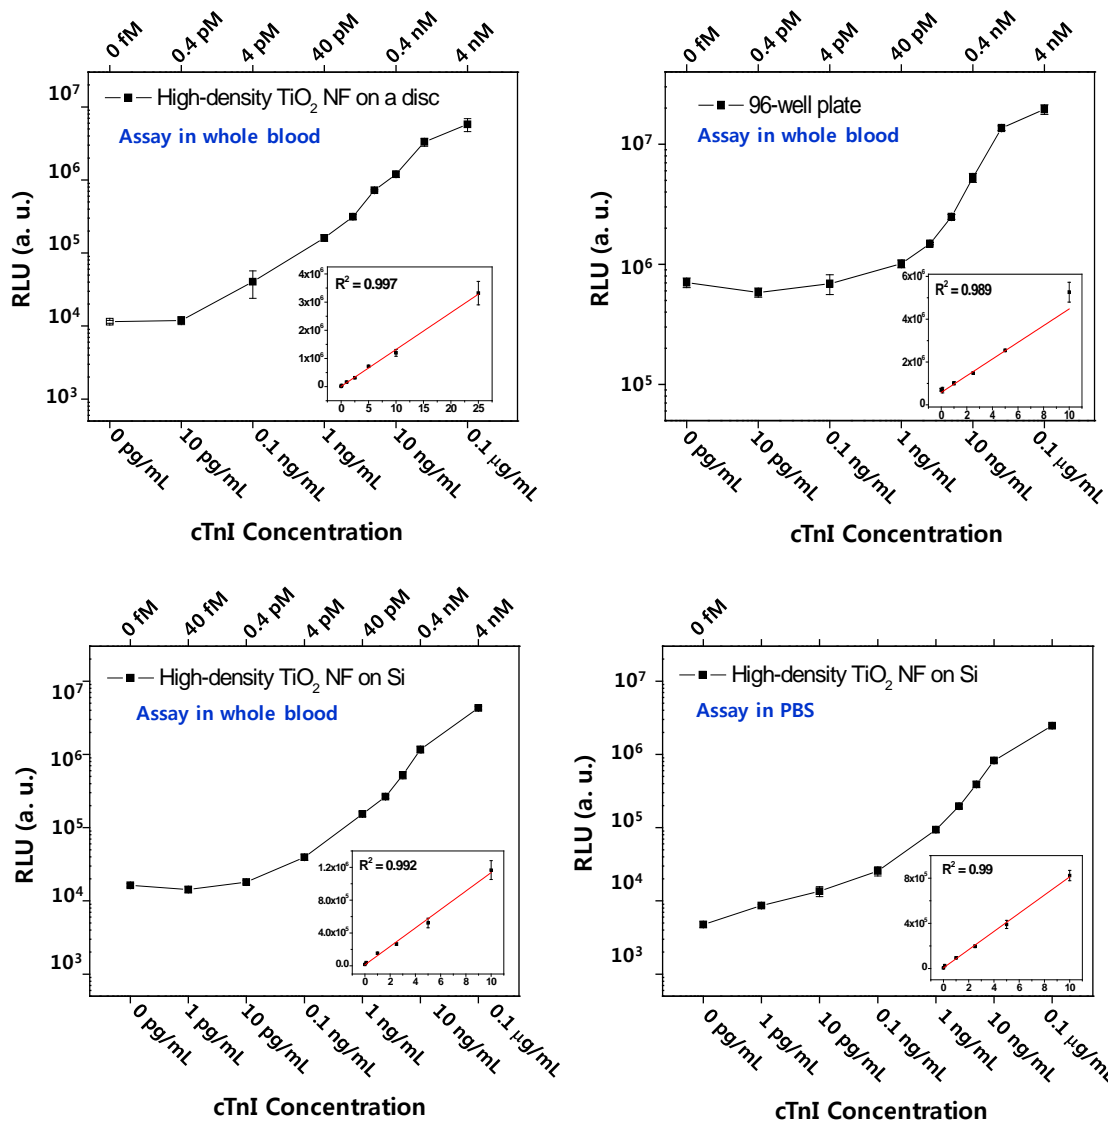

**Fig. S9.** Calibration graphs for the detection of cTnI spiked in healthy serum and PBS created by plotting the RLU versus the cTnI concentration in serum for HD TiO<sub>2</sub> NFs assembled on a disc [LOD: 37 pg/mL (1.5 pM)], 96-well plate [LOD: 824 pg/mL (33 pM)], HD TiO<sub>2</sub> NFs assembled on a Si substrate [LOD: 64 pg/mL (2.6 pM)], and cTnI in PBS for HD TiO<sub>2</sub> NFs assembled on a Si substrate [LOD: 4.4 pg/mL (0.18 pM)]. Error bars indicate the standard deviation of at least three independent measurements.

**Table S1.** Weight and atomic composition of a single TiO<sub>2</sub> NF by TEM–EDS analysis.

| Element | Weight (%) | Atomic (%) |
|---------|------------|------------|
| C K     | 53.79      | 72.70      |
| O K     | 17.22      | 17.47      |
| Ti K    | 29.00      | 9.83       |
| Totals  | 100.00     | 100.00     |

**Table S2.** Surface atomic composition of TiO<sub>2</sub> NFs from XPS.

| Element | TiO <sub>2</sub> | Ab <sub>1</sub> /TiO <sub>2</sub> | CRP/Ab <sub>1</sub> /TiO <sub>2</sub> |
|---------|------------------|-----------------------------------|---------------------------------------|
|         | Atomic (%)       | Atomic (%)                        | Atomic (%)                            |
| Si2p    | 15.86            | 7.88                              | 6.11                                  |
| S2p     | -                | 0.34                              | 0.59                                  |
| C1s     | 23.48            | 47.36                             | 54.27                                 |
| N1s     | 1.17             | 9.43                              | 12.39                                 |
| Ti2p    | 8.09             | 3.25                              | 1.56                                  |
| O1s     | 51.4             | 31.74                             | 25.07                                 |
| Totals  | 100.00           | 100.00                            | 100.00                                |



**Table S3.** Spin program for the immunoassay in a centrifugal microfluidic disc.

| Spin No.   | Speed (rpm) | Valve No. | Time (s) | Operation                                                                                                           |
|------------|-------------|-----------|----------|---------------------------------------------------------------------------------------------------------------------|
| 1          | 3600        |           | 60       | blood separation                                                                                                    |
| 2          | 2400        | 1         | 3        | open valve to transfer the plasma into the chamber containing 8 $\mu$ L of detecting antibodies conjugated with HRP |
| 3          | 15 Hz, 15°  |           | 5        | mix plasma and detecting antibodies                                                                                 |
| 4          | 2400        | 2         | 3        | open valve to transfer the mixture into binding reaction chamber                                                    |
| 5          | 60 Hz, 2°   |           | 1200     | mix capture antibodies on TiO <sub>2</sub> NF mat and plasma-detecting antibodies mixture                           |
| 6          | 2400        | 3         | 10       | open valve to remove the mixture                                                                                    |
| 7          | 2400        | 4         | 4        | open valve to transfer washing buffer                                                                               |
| 8          | 30 Hz, 30°  |           | 120      | mix washing buffer and wash TiO <sub>2</sub> NF mat                                                                 |
| 9          | 2400        |           | 4        | transfer washing buffer                                                                                             |
| 10         | 30 Hz, 30°  |           | 120      | mix washing buffer and wash TiO <sub>2</sub> NF mat                                                                 |
| 11         | 2400        |           | 4        | transfer washing buffer                                                                                             |
| 12         | 30 Hz, 30°  |           | 120      | mix washing buffer and wash TiO <sub>2</sub> NF mat                                                                 |
| 13         | 2400        |           | 20       | remove the remaining washing buffer                                                                                 |
| 14         |             | 5         |          | close valve                                                                                                         |
| 15         | 2400        | 6         | 10       | open valve and transfer the chemiluminescent substrate                                                              |
| 16         | 30 Hz, 2°   |           | 60       | mix substrate and the immunoreagents on TiO <sub>2</sub> NF mat                                                     |
| 17         | 2400        | 7         | 10       | open valve and transfer the reacted substrate to the detection chamber                                              |
| Total time |             | ~         | 30 min   |                                                                                                                     |
